# Supplementary material for: The SARS-CoV-2 Omicron Variant of Concern and its Rapid Spread throughout the Western Brazilian Amazon
Source: Preprints.org preprint supplement (doi:10.20944/preprints202204.0266.v1), 2022-04-28
Supplement: Supplementary file 1 [file supplementary]

We gratefully acknowledge the following Authors from the Originating laboratories responsible for obtaining the specimens, as well as the Submitting laboratories where the genome data were generated and shared via GISAID, on which this research is based.

All Submitters of data may be contacted directly via [www.gisaid.org](http://www.gisaid.org)

Authors are sorted alphabetically.

Acknowledgement EPI\_SET Identifier: EPI\_SET\_20220412us

| Accession ID                                                                                                                                                                                                                                                                                                                                                                                                                                                                                                                                    | Originating Laboratory                                                                            | Submitting Laboratory                                                                                              | Authors                                                                                                                                                                                                                                                                                                                                                                                                                                                                                                                                                           |
|-------------------------------------------------------------------------------------------------------------------------------------------------------------------------------------------------------------------------------------------------------------------------------------------------------------------------------------------------------------------------------------------------------------------------------------------------------------------------------------------------------------------------------------------------|---------------------------------------------------------------------------------------------------|--------------------------------------------------------------------------------------------------------------------|-------------------------------------------------------------------------------------------------------------------------------------------------------------------------------------------------------------------------------------------------------------------------------------------------------------------------------------------------------------------------------------------------------------------------------------------------------------------------------------------------------------------------------------------------------------------|
| EPI_ISL_9804746, EPI_ISL_9804747, EPI_ISL_9804770                                                                                                                                                                                                                                                                                                                                                                                                                                                                                               | BIOFAST                                                                                           | Instituto Butantan                                                                                                 | ; Alex Ranieri Lima; Antonio Jorge Martins; Claudia Renata dos Santos Barros; David Schlesinger; Debora Botequiu Moretti; Dimas Tadeu Covas; Elaine Cristina Marqueze; Elaine Vieira Santos; Evandra Strazza Rodrigues; Gabriela Ribeiro; Heidge Fukumasu; Jayme Augusto de Souza-Neto; Luiz Alcantara; Luiz Lehmann Coutinho; Maria Carolina Elias; Maurício Lacerda Nogueira; Raul Machado Neto; Rejane Maria Tommasini Grotto; Ricardo Haddad; Sandra Coccuzzo Sampaio Vessoni; Simone Kashima; Svetoslav Nanev Slavov; Vincent Louis Viala                    |
| EPI_ISL_10309887, EPI_ISL_10309927                                                                                                                                                                                                                                                                                                                                                                                                                                                                                                              | CENTRO DE SAUDE III DE SERRANA                                                                    | Instituto Butantan                                                                                                 | ; Alex Ranieri Lima; Antonio Jorge Martins; Claudia Renata dos Santos Barros; David Schlesinger; Debora Botequiu Moretti; Dimas Tadeu Covas; Elaine Cristina Marqueze; Elaine Vieira Santos; Evandra Strazza Rodrigues; Gabriela Ribeiro; Heidge Fukumasu; Jayme Augusto de Souza-Neto; Luiz Alcantara; Luiz Lehmann Coutinho; Maria Carolina Elias; Maurício Lacerda Nogueira; Raul Machado Neto; Rejane Maria Tommasini Grotto; Ricardo Haddad; Sandra Coccuzzo Sampaio Vessoni; Simone Kashima; Svetoslav Nanev Slavov; Vincent Louis Viala                    |
| EPI_ISL_9804748                                                                                                                                                                                                                                                                                                                                                                                                                                                                                                                                 | CENTRO SAUDE III DR JOSE TADEU MOURAO                                                             | Instituto Butantan                                                                                                 | ; Alex Ranieri Lima; Antonio Jorge Martins; Claudia Renata dos Santos Barros; David Schlesinger; Debora Botequiu Moretti; Dimas Tadeu Covas; Elaine Cristina Marqueze; Elaine Vieira Santos; Evandra Strazza Rodrigues; Gabriela Ribeiro; Heidge Fukumasu; Jayme Augusto de Souza-Neto; Luiz Alcantara; Luiz Lehmann Coutinho; Maria Carolina Elias; Maurício Lacerda Nogueira; Raul Machado Neto; Rejane Maria Tommasini Grotto; Ricardo Haddad; Sandra Coccuzzo Sampaio Vessoni; Simone Kashima; Svetoslav Nanev Slavov; Vincent Louis Viala                    |
| EPI_ISL_10309930                                                                                                                                                                                                                                                                                                                                                                                                                                                                                                                                | CS III DE PATROCINIO PAULISTA                                                                     | Instituto Butantan                                                                                                 | ; Alex Ranieri Lima; Antonio Jorge Martins; Claudia Renata dos Santos Barros; David Schlesinger; Debora Botequiu Moretti; Dimas Tadeu Covas; Elaine Cristina Marqueze; Elaine Vieira Santos; Evandra Strazza Rodrigues; Gabriela Ribeiro; Heidge Fukumasu; Jayme Augusto de Souza-Neto; Luiz Alcantara; Luiz Lehmann Coutinho; Maria Carolina Elias; Maurício Lacerda Nogueira; Raul Machado Neto; Rejane Maria Tommasini Grotto; Ricardo Haddad; Sandra Coccuzzo Sampaio Vessoni; Simone Kashima; Svetoslav Nanev Slavov; Vincent Louis Viala                    |
| EPI_ISL_9747814, EPI_ISL_9747820, EPI_ISL_9747823, EPI_ISL_9747824, EPI_ISL_9747835, EPI_ISL_9747900                                                                                                                                                                                                                                                                                                                                                                                                                                            | Fundacao Ezequiel Dias                                                                            | Instituto Rene Rachou / Fiocruz Minas                                                                              | on behalf of the Fiocruz COVID-19 Genomic Surveillance Network                                                                                                                                                                                                                                                                                                                                                                                                                                                                                                    |
| EPI_ISL_9274900                                                                                                                                                                                                                                                                                                                                                                                                                                                                                                                                 | Hospital da Baleia                                                                                | Instituto Rene Rachou / Fiocruz Minas                                                                              | Alana Oliveira; Anna Salim; Camila Corsini; Daniel Miranda; Gabriel Fernandes; Mozar de Castro; Nathalie Almeida; Pedro Alves; Priscilla Filgueiras; Rafaella Fortini; Raphael Silva; Raquel Vilela; Rubens do Monte Neto; Sarah Gomes; Thais Silva; Wander Jeremias                                                                                                                                                                                                                                                                                              |
| EPI_ISL_402123                                                                                                                                                                                                                                                                                                                                                                                                                                                                                                                                  | Institute of Pathogen Biology, Chinese Academy of Medical Sciences & Peking Union Medical College | Institute of Pathogen Biology, Chinese Academy of Medical Sciences & Peking Union Medical College                  | Chao Wu; Jianwei Wang; Lili Ren; Qi Jin; Yiwei Liu; Zhiqiang Wu; Zichun Xiang                                                                                                                                                                                                                                                                                                                                                                                                                                                                                     |
| EPI_ISL_9747771, EPI_ISL_9747777, EPI_ISL_9747782, EPI_ISL_9747783, EPI_ISL_9747784                                                                                                                                                                                                                                                                                                                                                                                                                                                             | Instituto Rene Rachou / Fiocruz Minas                                                             | Instituto Rene Rachou / Fiocruz Minas                                                                              | on behalf of the Fiocruz COVID-19 Genomic Surveillance Network                                                                                                                                                                                                                                                                                                                                                                                                                                                                                                    |
| EPI_ISL_9344681                                                                                                                                                                                                                                                                                                                                                                                                                                                                                                                                 | LABORATORIO DE FRANCA - FRANCA - 2064154                                                          | Instituto Butantan                                                                                                 | Antonio Jorge Martins; Claudia Renata dos Santos Barros; David Schlesinger; Debora Botequiu Moretti; Dimas Tadeu Covas; Elaine Cristina Marqueze; Elaine Vieira Santos; Evandra Strazza Rodrigues; Heidge Fukumasu; Jayme Augusto de Souza-Neto; José Salvatore Leister Patané; Luiz Alcantara; Luiz Lehmann Coutinho; Maria Carolina Elias; Maurício Lacerda Nogueira; Rafael dos Santos Bezerra; Raul Machado Neto; Rejane Maria Tommasini Grotto; Ricardo Haddad; Sandra Coccuzzo Sampaio Vessoni; Simone Kashima; Svetoslav Nanev Slavov; Vincent Louis Viala |
| EPI_ISL_9804749                                                                                                                                                                                                                                                                                                                                                                                                                                                                                                                                 | LABORATORIO MUNICIPAL DE PIRACICABA                                                               | Instituto Butantan                                                                                                 | ; Alex Ranieri Lima; Antonio Jorge Martins; Claudia Renata dos Santos Barros; David Schlesinger; Debora Botequiu Moretti; Dimas Tadeu Covas; Elaine Cristina Marqueze; Elaine Vieira Santos; Evandra Strazza Rodrigues; Gabriela Ribeiro; Heidge Fukumasu; Jayme Augusto de Souza-Neto; Luiz Alcantara; Luiz Lehmann Coutinho; Maria Carolina Elias; Maurício Lacerda Nogueira; Raul Machado Neto; Rejane Maria Tommasini Grotto; Ricardo Haddad; Sandra Coccuzzo Sampaio Vessoni; Simone Kashima; Svetoslav Nanev Slavov; Vincent Louis Viala                    |
| EPI_ISL_9521259                                                                                                                                                                                                                                                                                                                                                                                                                                                                                                                                 | LACES                                                                                             | LGBio (Laboratório de Genética & Biodiversidade)                                                                   | Alex Honda Bernardes; Amanda Alves de Melo; Aparecido Divino da Cruz; Cintia Pelegrinetti Targueta de Azevedo Brito; Daniela de Melo e Silva; Elisangela de Paula Silveira Lacerda; Juliana Santana de Curcio; Luiz Augusto Pereira; Marc Alexandre Duarte Gigonzac; Mariana Pires de Campos Telles; Mariane Brom Sobreiro; Ramilla dos Santos Braga; Renata de Oliveira Dias; Rhewter Nunes; Thais Cidália Vieira Gigonzac; Thais Guimarães Castro; Thays Millena Alves Pedroso                                                                                  |
| EPI_ISL_9274974, EPI_ISL_9274978, EPI_ISL_9274982, EPI_ISL_9274983, EPI_ISL_9275005, EPI_ISL_9275023, EPI_ISL_9275024, EPI_ISL_9275031, EPI_ISL_9275047, EPI_ISL_9275059, EPI_ISL_9275061, EPI_ISL_9747677, EPI_ISL_9747684, EPI_ISL_9747695, EPI_ISL_9747699, EPI_ISL_9747707, EPI_ISL_9747708, EPI_ISL_9747710, EPI_ISL_9747711, EPI_ISL_9747712, EPI_ISL_9747720, EPI_ISL_9747721, EPI_ISL_9747735, EPI_ISL_9747747, EPI_ISL_9747749, EPI_ISL_9747754, EPI_ISL_9747755, EPI_ISL_9747758, EPI_ISL_9747766, EPI_ISL_11133075, EPI_ISL_11133082 | Laboratorio Municipal de Biologia Molecular                                                       | Instituto Rene Rachou / Fiocruz Minas                                                                              | Andre Menezes; Anna Salim; Caroline Rocha; Eneida Oliveira; Flavio Araujo; Gabriel Fernandes; On behalf of COVID-19 Fiocruz genomic network; Pedro Alves; Rubens do Monte Neto; Thais Silva                                                                                                                                                                                                                                                                                                                                                                       |
| EPI_ISL_8665271, EPI_ISL_8665273, EPI_ISL_8665274, EPI_ISL_8665275, EPI_ISL_8665277, EPI_ISL_8665278, EPI_ISL_8665280, EPI_ISL_8665281                                                                                                                                                                                                                                                                                                                                                                                                          | Laboratorio de Pesquisa em Virologia, FAMERP, SJRP                                                | Laboratorio de Pesquisa em Virologia, FAMERP, SJRP                                                                 | Beatriz de Carvalho Marques; Cecilia Artico Banho; Cintia Bittar; Fábio Sossai Possebon; Guilherme Campos; Helena Lage Ferreira; Jorge A. Petrolí Marchesi; João Pessoa Araújo Jr.; Leila Sabrina Ullmann; Livia Sacchetto; Maisa C. Pereira Parra; Marília Moraes; Maurício L. Nogueira.; Paula Rahal; Paulo Inacio da Costa                                                                                                                                                                                                                                     |
| EPI_ISL_9416869, EPI_ISL_9500047, EPI_ISL_9500048, EPI_ISL_9853214                                                                                                                                                                                                                                                                                                                                                                                                                                                                              | Laboratório Central de Saúde Pública do Amazonas - LACEN-AM                                       | Laboratório de Ecologia de Doenças Transmissíveis na Amazônia, Instituto Leonidas e Maria Deane - Fiocruz Amazônia | André Corado; Arlesson Viana Da Silva; Dejanane Silva; Felipe Naveca on behalf of the Fiocruz COVID-19 Genomic Surveillance Network; Fernanda Nascimento; George Silva; Luciana Gonçalves; Maria Júlia Brandão; Matilde Mejía; Valdinete Nascimento; Victor Souza                                                                                                                                                                                                                                                                                                 |
| EPI_ISL_10309928                                                                                                                                                                                                                                                                                                                                                                                                                                                                                                                                | PRAÇA CONÉGO JOAQUIM ALVES - PCR                                                                  | Instituto Butantan                                                                                                 | ; Alex Ranieri Lima; Antonio Jorge Martins; Claudia Renata dos Santos Barros; David Schlesinger; Debora Botequiu Moretti; Dimas Tadeu Covas; Elaine Cristina Marqueze; Elaine Vieira Santos; Evandra Strazza Rodrigues; Gabriela Ribeiro; Heidge Fukumasu; Jayme Augusto de Souza-Neto; Luiz Alcantara; Luiz Lehmann Coutinho; Maria Carolina Elias; Maurício Lacerda Nogueira; Raul Machado Neto; Rejane Maria Tommasini Grotto; Ricardo Haddad; Sandra Coccuzzo Sampaio Vessoni; Simone Kashima; Svetoslav Nanev Slavov; Vincent Louis Viala                    |
| EPI_ISL_10309544                                                                                                                                                                                                                                                                                                                                                                                                                                                                                                                                | SAE SERVICO DE ATENDIMENTO ESPECIALIZADO                                                          | Instituto Butantan                                                                                                 | ; Alex Ranieri Lima; Antonio Jorge Martins; Claudia Renata dos Santos Barros; David Schlesinger; Debora Botequiu Moretti; Dimas Tadeu Covas; Elaine Cristina Marqueze; Elaine Vieira Santos; Evandra Strazza Rodrigues; Gabriela Ribeiro; Heidge Fukumasu; Jayme Augusto de Souza-Neto; Luiz Alcantara; Luiz Lehmann Coutinho; Maria Carolina Elias; Maurício Lacerda Nogueira; Raul Machado Neto; Rejane Maria Tommasini Grotto; Ricardo Haddad; Sandra Coccuzzo Sampaio Vessoni; Simone Kashima; Svetoslav Nanev Slavov; Vincent Louis Viala                    |
| EPI_ISL_9804771                                                                                                                                                                                                                                                                                                                                                                                                                                                                                                                                 | SECRETARIA MUNICIPAL DE SAUDE DE CORDEIROPOLIS                                                    | Instituto Butantan                                                                                                 | ; Alex Ranieri Lima; Antonio Jorge Martins; Claudia Renata dos Santos Barros; David Schlesinger; Debora Botequiu Moretti; Dimas Tadeu Covas; Elaine Cristina Marqueze; Elaine Vieira Santos; Evandra Strazza Rodrigues; Gabriela Ribeiro; Heidge Fukumasu; Jayme Augusto de Souza-Neto; Luiz Alcantara; Luiz Lehmann Coutinho; Maria Carolina Elias; Maurício Lacerda Nogueira; Raul Machado Neto; Rejane Maria Tommasini Grotto; Ricardo Haddad; Sandra Coccuzzo Sampaio Vessoni; Simone Kashima; Svetoslav Nanev Slavov; Vincent Louis Viala                    |
| EPI_ISL_9804778                                                                                                                                                                                                                                                                                                                                                                                                                                                                                                                                 | UPA DR GERALDO CESAR PAIVA REIS                                                                   | Instituto Butantan                                                                                                 | ; Alex Ranieri Lima; Antonio Jorge Martins; Claudia Renata dos Santos Barros; David Schlesinger; Debora Botequiu Moretti; Dimas Tadeu Covas; Elaine Cristina Marqueze; Elaine Vieira Santos; Evandra Strazza Rodrigues; Gabriela Ribeiro; Heidge Fukumasu; Jayme Augusto de Souza-Neto; Luiz Alcantara; Luiz Lehmann Coutinho; Maria Carolina Elias; Maurício Lacerda Nogueira; Raul Machado Neto; Rejane Maria Tommasini Grotto; Ricardo Haddad; Sandra Coccuzzo Sampaio Vessoni; Simone Kashima; Svetoslav Nanev Slavov; Vincent Louis Viala                    |
| EPI_ISL_10309543                                                                                                                                                                                                                                                                                                                                                                                                                                                                                                                                | VIGILANCIA EM SAUDE SAE VIGILANCIA EPIDEMIOLOGICA                                                 | Instituto Butantan                                                                                                 | ; Alex Ranieri Lima; Antonio Jorge Martins; Claudia Renata dos Santos Barros; David Schlesinger; Debora Botequiu Moretti; Dimas Tadeu Covas; Elaine Cristina Marqueze; Elaine Vieira Santos; Evandra Strazza Rodrigues; Gabriela Ribeiro; Heidge Fukumasu; Jayme Augusto de Souza-Neto; Luiz Alcantara; Luiz Lehmann Coutinho; Maria Carolina Elias; Maurício Lacerda Nogueira; Raul Machado Neto; Rejane Maria Tommasini Grotto; Ricardo Haddad; Sandra Coccuzzo Sampaio Vessoni; Simone Kashima; Svetoslav Nanev Slavov; Vincent Louis Viala                    |
